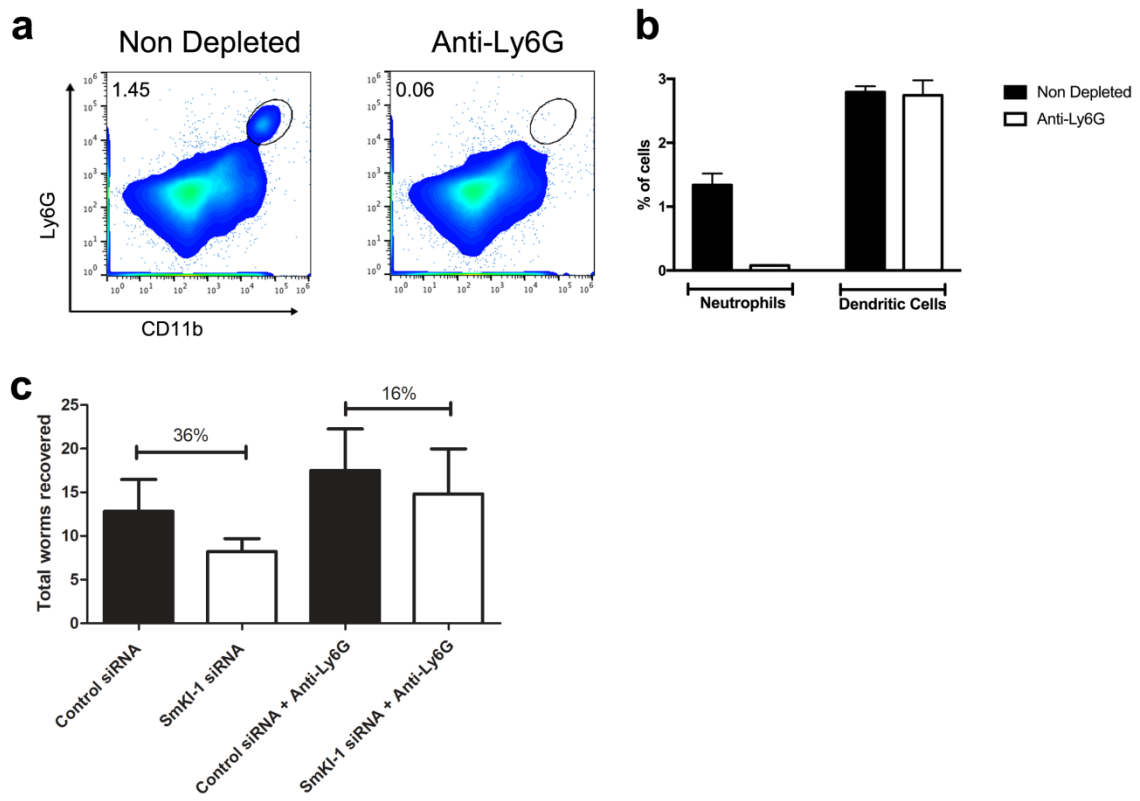

**S3 Fig. Depletion of neutrophils *in vivo* during *SmKI-1*-suppressed parasites infection.**
