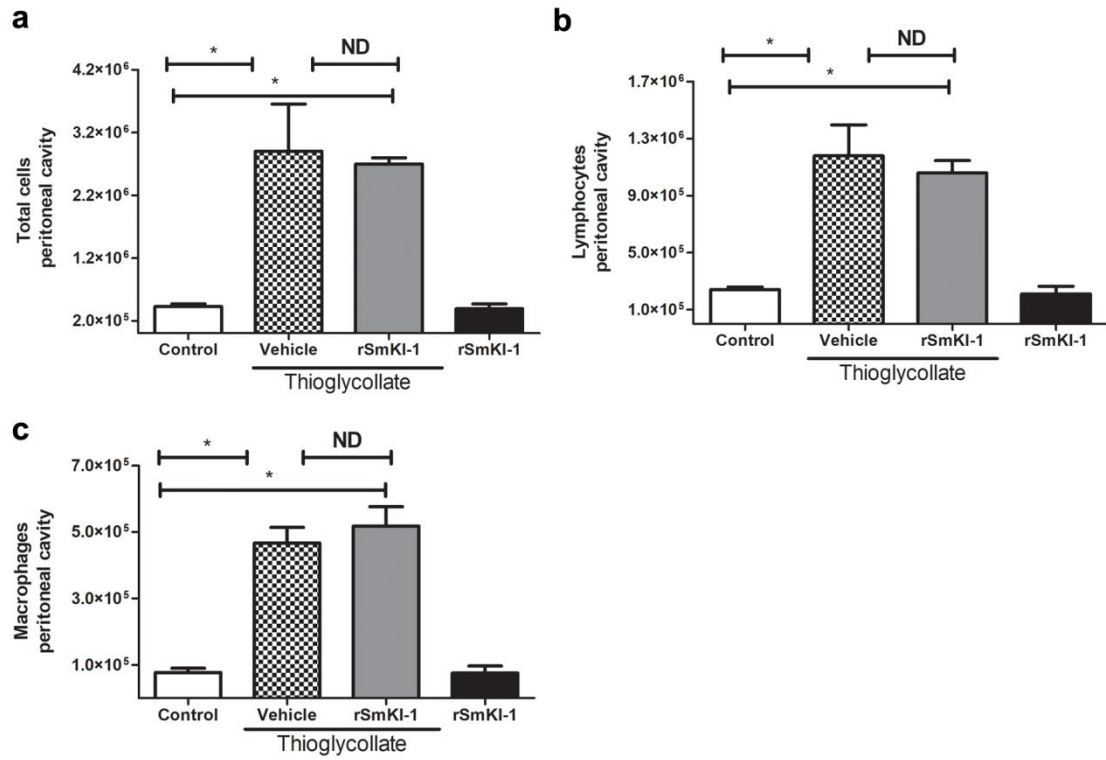

**S4 Fig. *SmKI-1* does not affect the migration of lymphocytes and macrophages.**
