# Supplementary material for: Schistosoma mansoni SmKI-1 serine protease inhibitor binds to elastase and impairs neutrophil function and inflammation
Source: PLOS journal article supplement (doi:10.1371/journal.ppat.1006870), 2018-02-09
Supplement: S2 (10.1371/journal.ppat.1006870.s002) [file redirect.do]

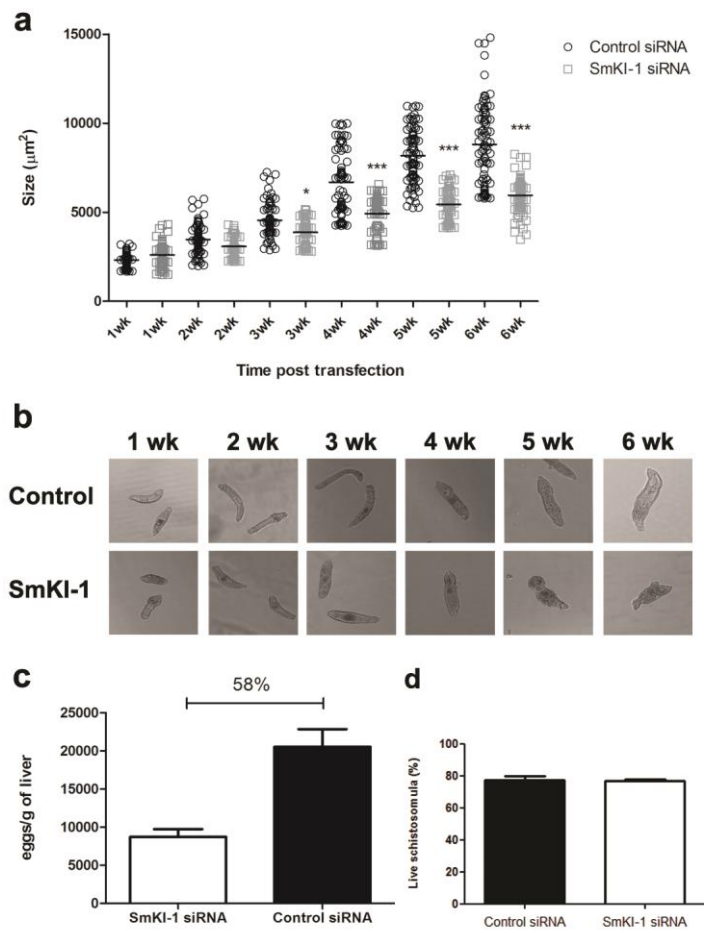

**S2 Fig. *SmKI-1* is important in parasite development.**
